# Supplementary material for: Kindlin-2 Modulates the Survival, Differentiation, and Migration of Induced Pluripotent Cell-Derived Mesenchymal Stromal Cells
Source: Hindawi journal article supplement (doi:10.1155/2017/7316354), 2017-01-01

# Supplementary figure 1

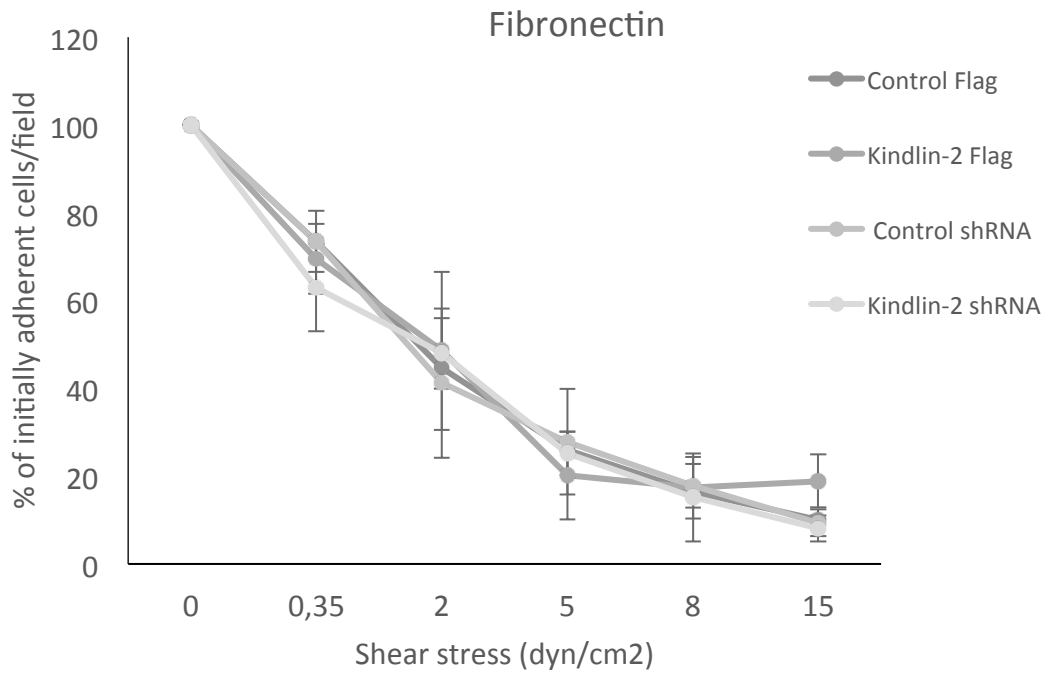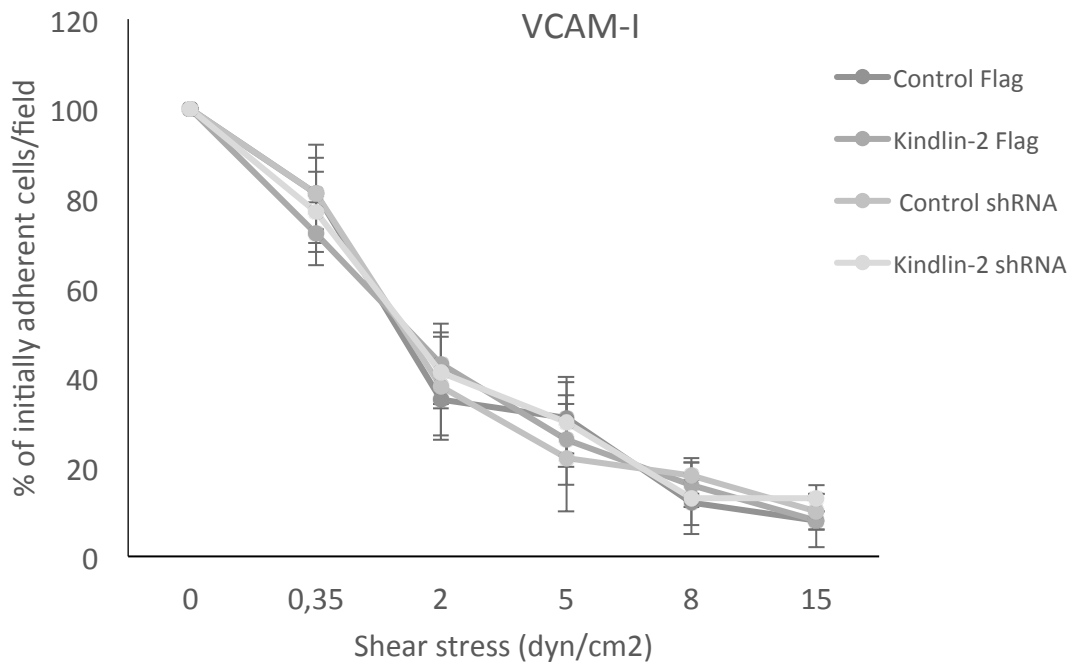

Supplement: f1 [file 7316354.f1.pdf]
